# Supplementary material
Source: PubMed Central journal article supplement (PMC5207270)
Supplement: 10.1074_M116.753129_jbc.M116.753129-1.pdf [file 10.1074_M116.753129_jbc.M116.753129-1.pdf]

## Supplemental figure legends

**Figure S1. PCR genotyping on CCSP-rtTA;Tet-on-Kras4b<sup>G12D</sup> transgenic mice, and Kras(G12D) induced prostatic lesions responding to doxycycline withdrawal. (A)** Genomic DNA was extracted from mice tails. The primers (listed in Supplemental Table 1) were used for detecting Kras and rtTA gene fragment by PCR amplification. For example, the mouse “8724” was detected as double CCSP-rtTA;Tet-on-Kras4b<sup>G12D</sup> positive. This mouse was used for the experiment in Figure 1. **(B)** Phase images of Kras(G12D) grafts derived from 8 weeks of Dox induction through drinking water (+Dox) or 8 weeks Dox induction plus 4 weeks of Dox withdrawal (-Dox). **(C)** H&E staining of the regenerated tissues from (B). Scale bar, 50  $\mu$ m.

**Figure S2. Androgen levels in the host regulate the growth of Kras(G12D)+AR tumors. (A)** Kras(G12D)+AR xenografts responded to the addition of external androgen in the host mice. Kras(G12D)+AR tumor xenografts were seeded subcutaneously in the flank sides of SCID mice. Additionally, an external androgen pellet was implanted subcutaneously on the back of host mice in one group, but not the other group (under physiological androgen levels). Xenografts were harvested for analysis after 8 weeks. The volume of the tumors was measured. The white arrow indicates the location of a tumor, and the blue arrow is a testosterone pellet. **(B)** H&E (a and b) and IHC staining of CK5 (red)/CK8 (green)/DAPI (blue) (c and d) in Kras(G12D)+AR tumor xenografts. Scale bar, 50  $\mu$ m.

**Figure S3. Physiological androgen levels were required for the regeneration of secondary tumors. A)** Schematic representation of the experimental design for generating the secondary tumor under intact/castrated recipients. Dissociated single cells from a primary Kras(G12D)+AR

tumor were injected subcutaneously into intact or castrated SCID mice. Xenografts were monitored and harvested after 2 months. **B)** Secondary tumors were formed in the intact SCID mice, but not the castrated recipients. The white arrow indicates the location of a tumor. **C)** Red and green fluorescence images (scale bar, 2 mm), H&E and IHC staining of p63, CK5 (red)/CK8 (green)/DAPI (blue), and AR of secondary Kras(G12D)+AR tumors. Kras(G12D)+AR tumorigenic cells from our previous study (carrying both RFP and GFP markers) were implanted subcutaneously in intact or castrated recipient SCID mice. Intact recipients developed tumors with GFP/RFP markers. The expression of AR, p63 and CK5/CK8 in tumor tissues and the tumor pathology were similar to those previously described. Scale bar, 50  $\mu$ m.

**Figure S4. Localization of p63<sup>+</sup>, CK5<sup>+</sup>, CK5<sup>+</sup>/CK8<sup>+</sup>, and CK8<sup>+</sup> cells in Kras(G12D)+AR tumors after removal of the external androgen pellet. Related to Figure 2B, f and 2B, i.** IHC staining of p63 **(A)** (a zoom-in of Figure 2B, f) and CK5 (red)/CK8 (green)/DAPI (blue) **(B)** (a zoom-in of Figure 2B, i) on Kras+AR tumor xenografts. Line (red in A and white in B) indicates tumor region and its surrounding stromal region. Multiple layers of CK5<sup>+</sup> cells (red), a lay of CK5<sup>+</sup>/CK8<sup>+</sup> cells (yellow), and multiple layers CK8<sup>+</sup> cells (green) were distributed from basal layer toward luminal region. Red arrow indicates p63<sup>+</sup> cells. **C)** IHC staining of CK5 (red)/CK8 (green)/DAPI (blue) on normal prostate tissue, Kras(G12D)+AR tumors with the external androgen pellet or after withdrawal of the androgen pellet. Scale bar, 50  $\mu$ m.

**Figure 5 Gli1 and Gli2 expression levels were elevated in Kras+AR tumors.** **A)** The expression levels of Gli1, Gli2, and 18S rRNA were analyzed by RT-PCR in regenerated prostate tissues derived from normal regenerated tissues or Kras+AR tumors from the second

recipient. **B)** The expression levels of Gli1 and Gli2 expression were analyzed by immunohistochemistry in the regenerated normal prostate tissues (control) or Kras+AR tumors from the second recipient. The red arrows indicate the staining of Gli1 or Gli2. \*\*\*:p<0.005.

**Figure S6. Verification of AR(WT), AR mutants, and Gli3T expression. (A) Related to**

**Figure 3.** 293T cells were transduced with AR(WT) or its mutants including AR( $\Delta$ Pro), AR(V518F), AR( $\Delta$ NLS), and AR(N705S) (with no GFP reporter) by lentiviral infection. The expression levels of AR(WT) and AR mutants were examined by western blot analysis. **(B) Related to Figure 4.** Schematic representation of Gli3 and C-terminally truncated form of Gli3 (Gli3T) that acts as a dominant repressor of Gli transcription. Gli3T was cloned into a lentiviral vector as described in the Supplemental Methods. Schematic of lentiviral constructs expressing Gli3T (labeled with RFP). **(C)** 293T cells were transduced with indicated volumes of Gli3T virus by lentiviral infection. The expression levels of Gli3T and endogenous Gli3 (endo. Gli3) were analyzed by Western analysis. **(D)** UGSM cells were transduced with Gli3T or control vector by lentiviral infection. The mRNA levels of Patched1 (*Ptc1*), *Bcl2*, and *GAPDH* were measured by RT-PCR. *Ptc1* and *Bcl2* were normalized to *GAPDH* and set as 1 in control vector. \*\*\*: p<0.001

**Figure S7, related to Figure 5. Validation of Gli1/2 shRNA. (A)** Schematic representation of the lentiviral vector for shRNA expression including RFP expression controlled by a separate CMV promoter. **(B)** Three shRNAs targeting Gli1, and two shRNAs targeting Gli2 were created in the lentiviral vector. UGSM cells were transduced with the shRNAs by lentiviral infection. The expression level of Gli1 and Gli2 were analyzed by RT-PCR. The Gli1-shRNA-771 and Gli2-shRNA-3'UTR with the best knockdown efficiency were used for *in vivo* experiments in Figure 5 and 6. The mock was normalized to *GAPDH* and set as 1. \*\*\*: p<0.001

**Figure S8. The effect of Gli signaling on normal prostate regeneration.** Prostate epithelial cells derived from CCSP-rtTA;Tet-on-Kras4b<sup>G12D</sup> transgenic mice were transduced with control vector, overexpression of Gli3T, shRNA-Gli1, or shRNA-Gli2. The transduced cells were mixed with UGSM and implanted under the renal capsule. Host SCID mice were fed with normal drinking water (no induction of Kras) for 8 weeks. The regenerated tissues became normal tissue due to no induction of Kras. **(A)** Phase and RFP images of normal regenerated tissues. Scale bar, 3 mm. **(B)** H&E, RFP fluorescence, and IHC staining of AR, p63, CK5 (red)/CK8 (green)/DAPI (blue) in regenerated tissues of Vector control, over-expression of Gli3T, shRNA-Gli1, and shRNA-Gli2. Scale bar, 50  $\mu$ m.

**Figure S9. The effect of Gli signaling on Kras mediated transformation.** Prostate epithelial cells derived from CCSP-rtTA;Tet-on-Kras4b<sup>G12D</sup> transgenic mice were transduced with control vector, overexpression of Gli3T, shRNA-Gli1, or shRNA-Gli2. The transduced cells were mixed with UGSM and implanted under the renal capsule. Host SCID mice were fed with Dox in the drinking water for 8 weeks for induction of Kras. **(A)** Phase and RFP images of the regenerated tissues with an induction of Kras. Scale bar, 5 mm. **(B)** H&E, RFP fluorescence, and IHC staining of AR, p63, CK5 (red)/CK8 (green)/DAPI (blue) in Kras-mediated tissues with vector control, over-expression of Gli3T, shRNA-Gli1, and shRNA-Gli2. Scale bar, 50  $\mu$ m.

Figure S1

A)

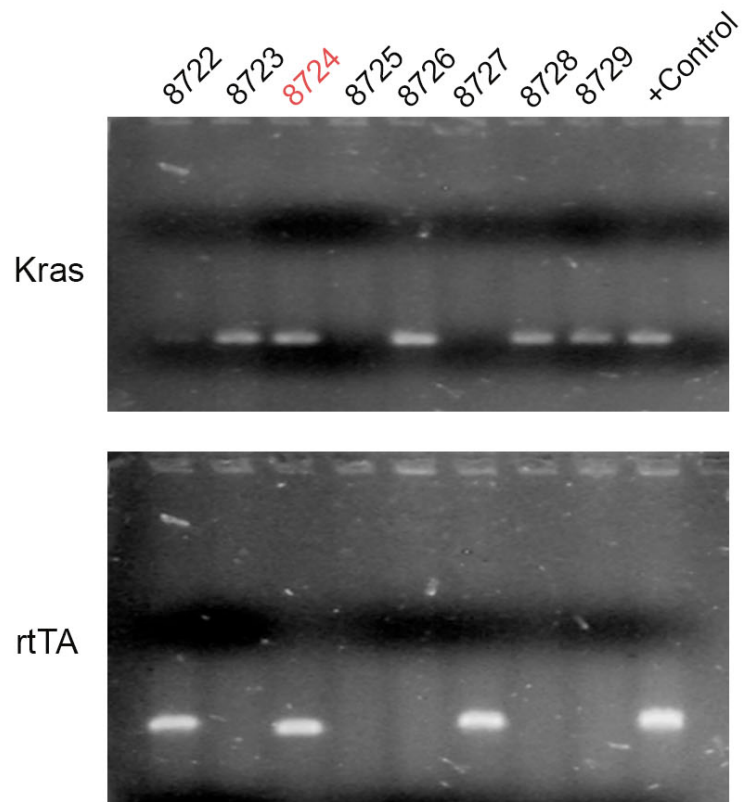

B)

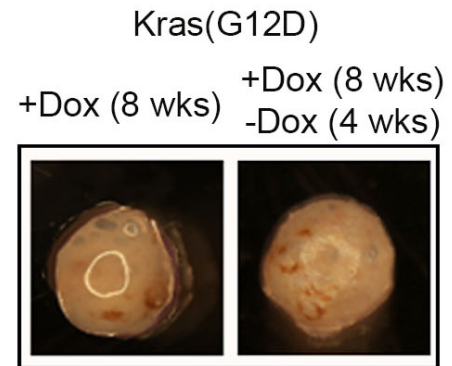

C)

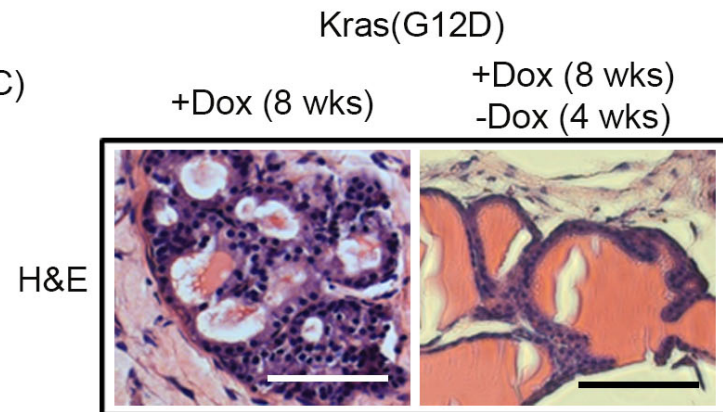

Figure S2

A)

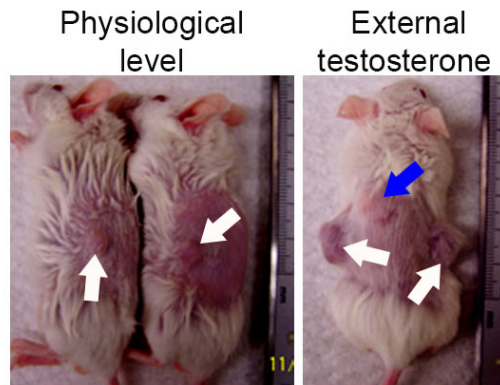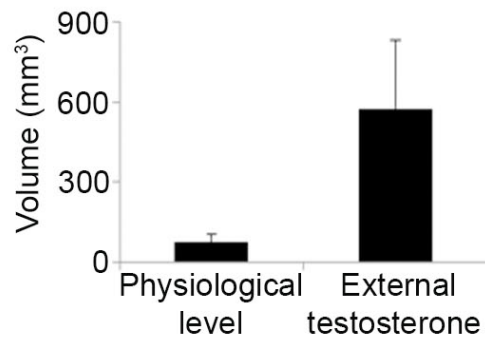

B)

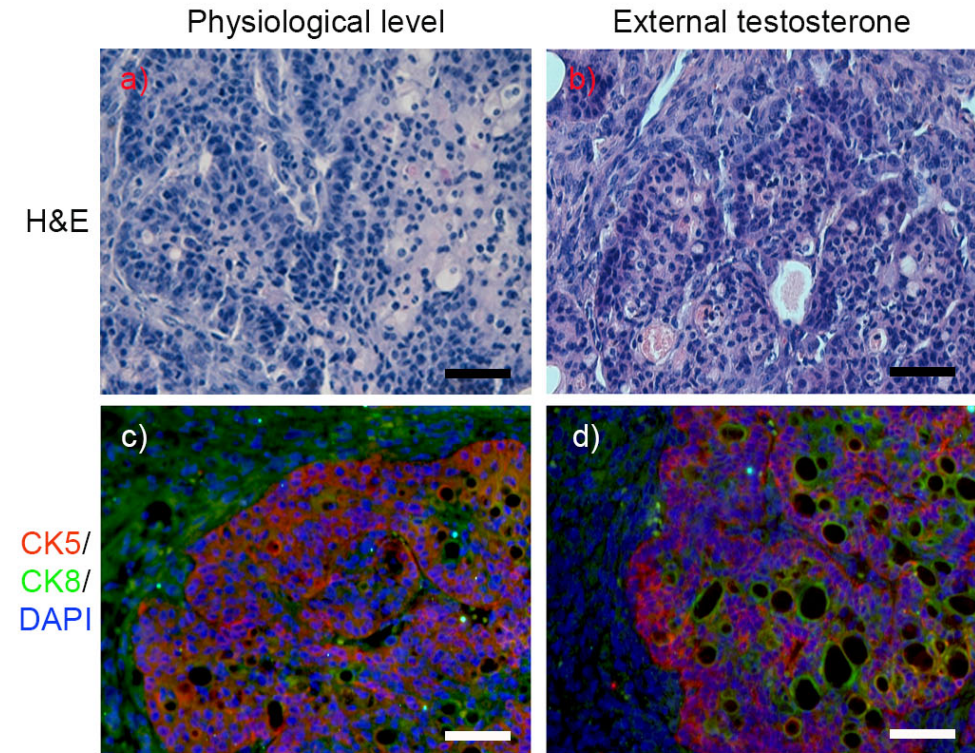

Figure S3

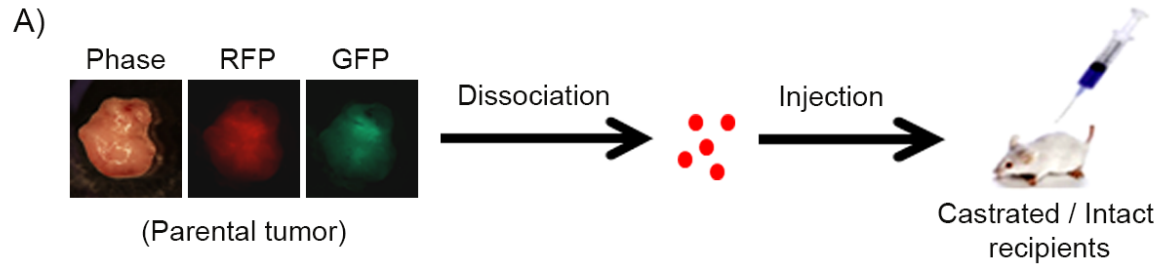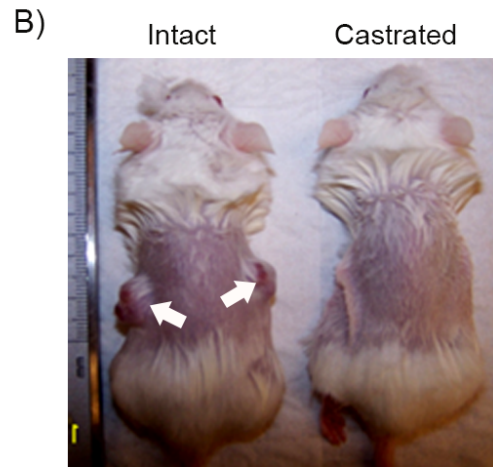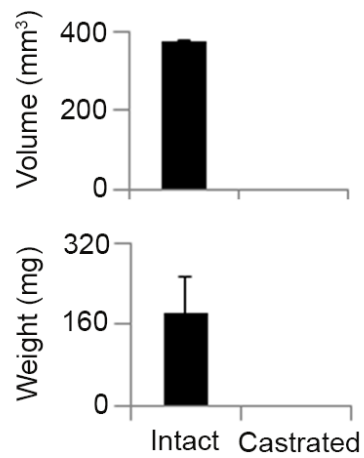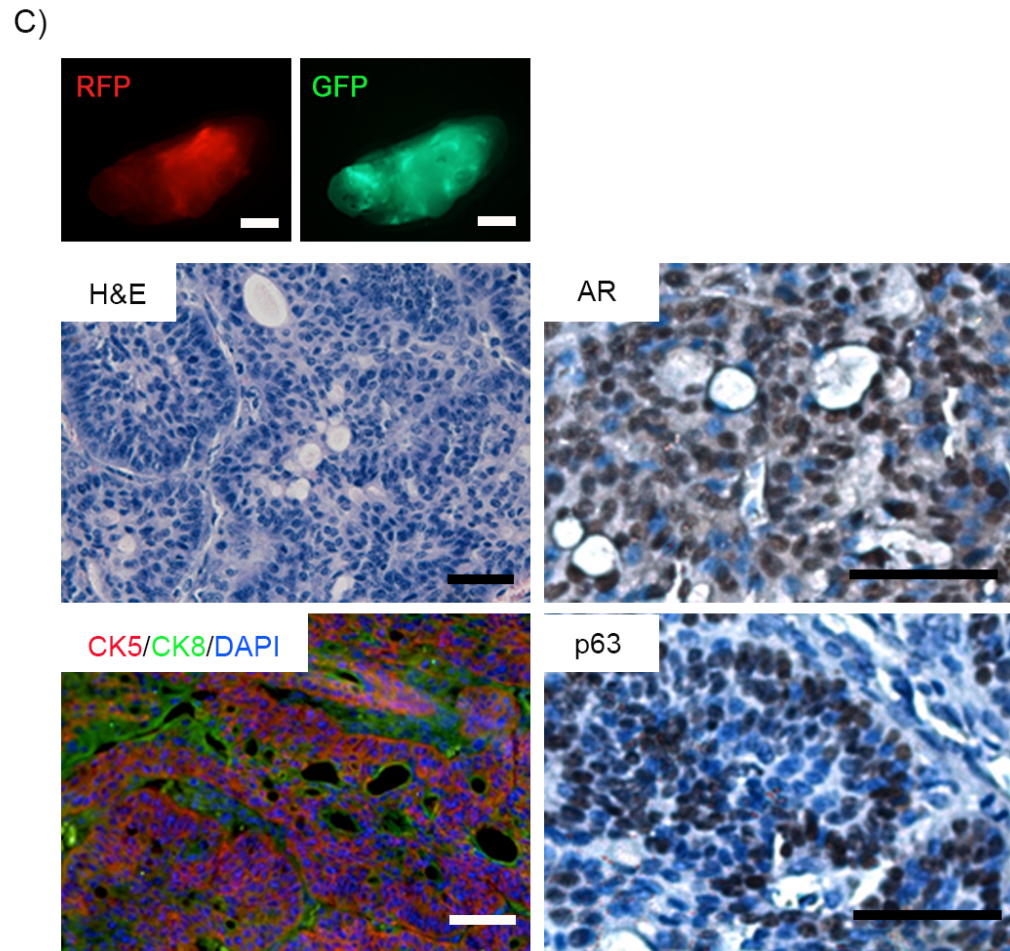

Figure S4

A)

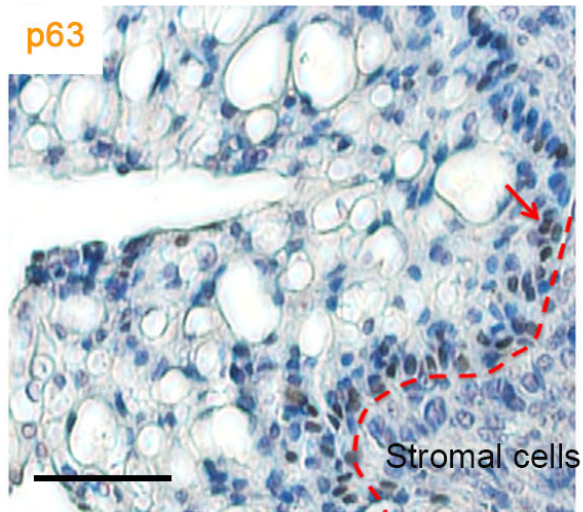

B)

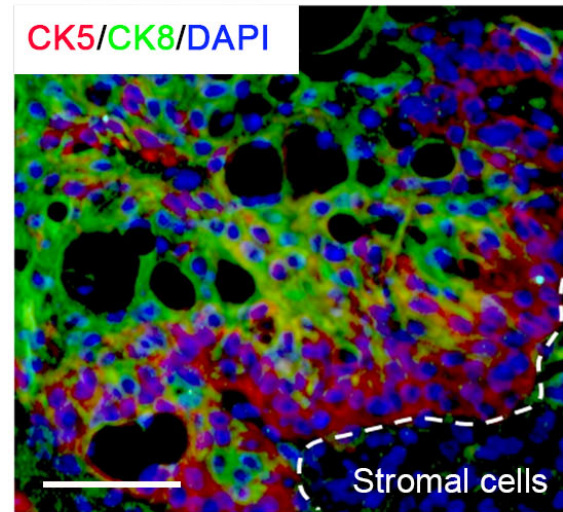

C)

Normal Prostate Tissue

Kras(G12D) + AR tumor

Androgen pellet Remained

Androgen pellet withdrawn

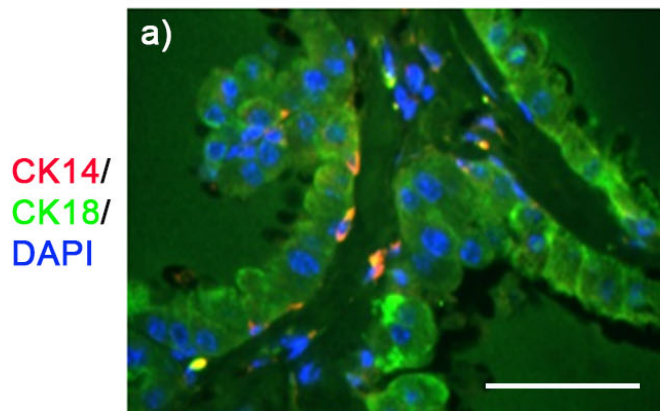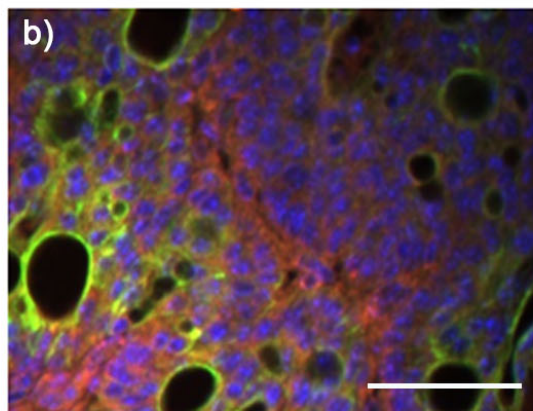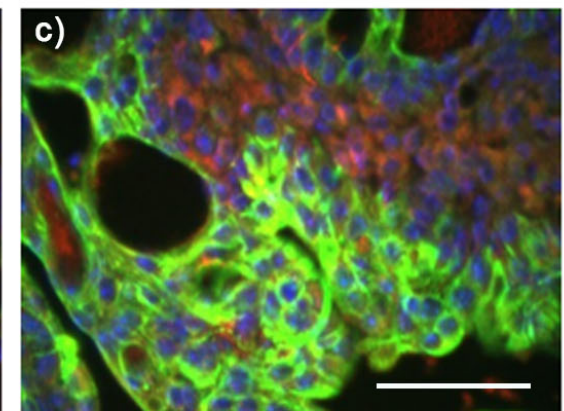



Figure S5

A)

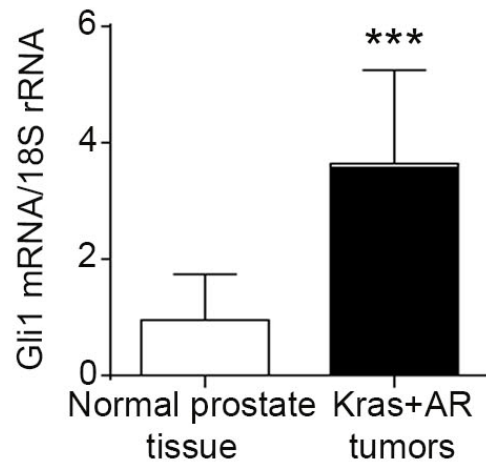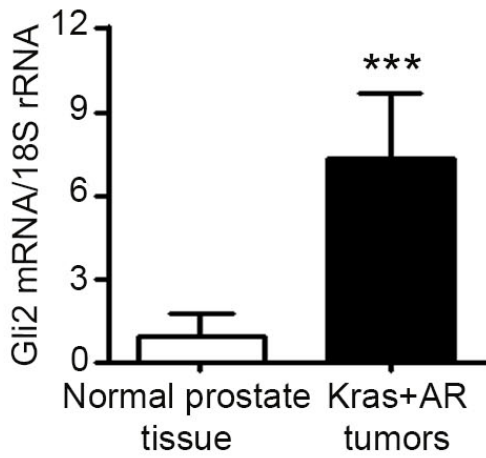

B)

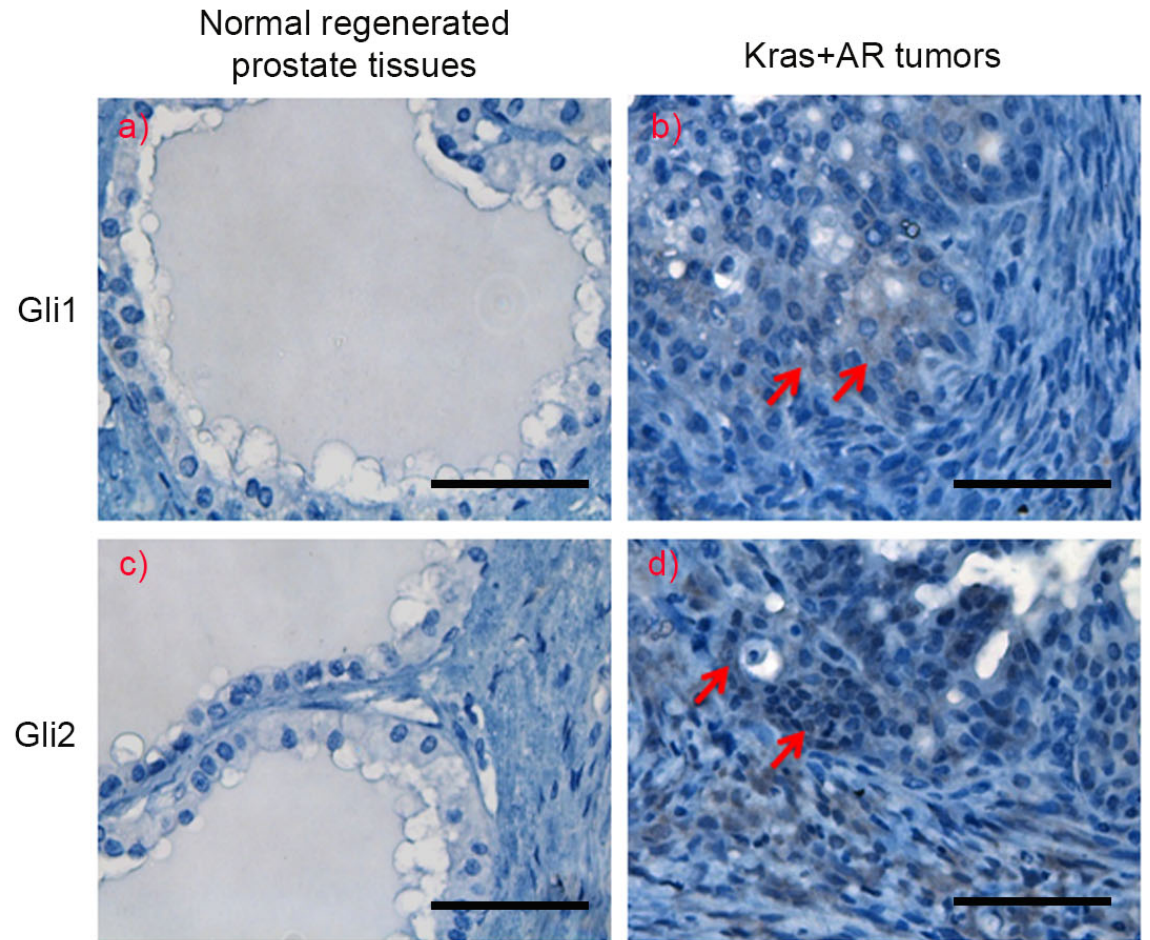

Figure S6

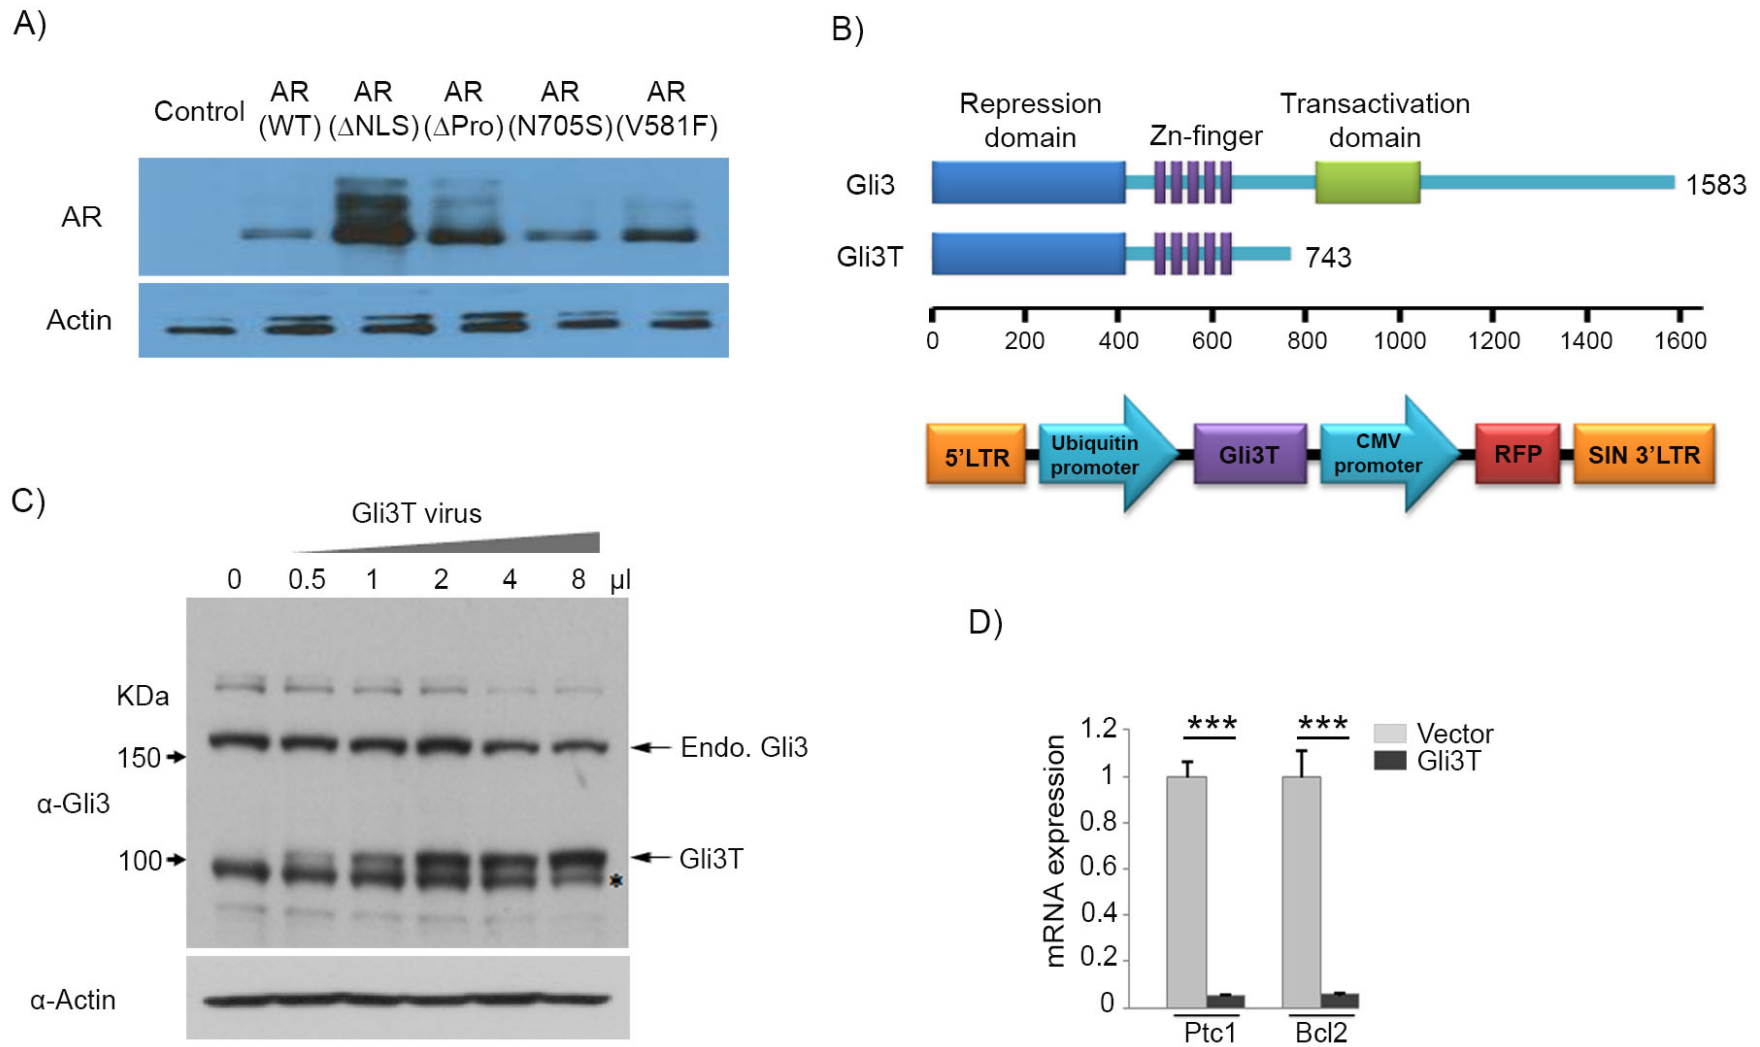

Figure S7

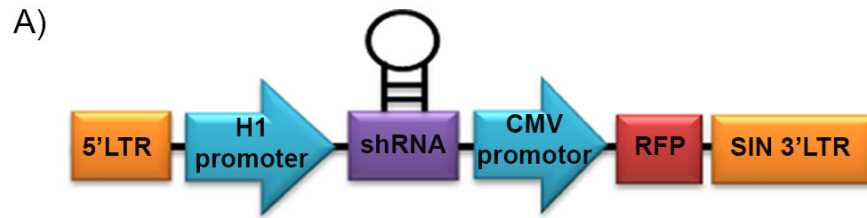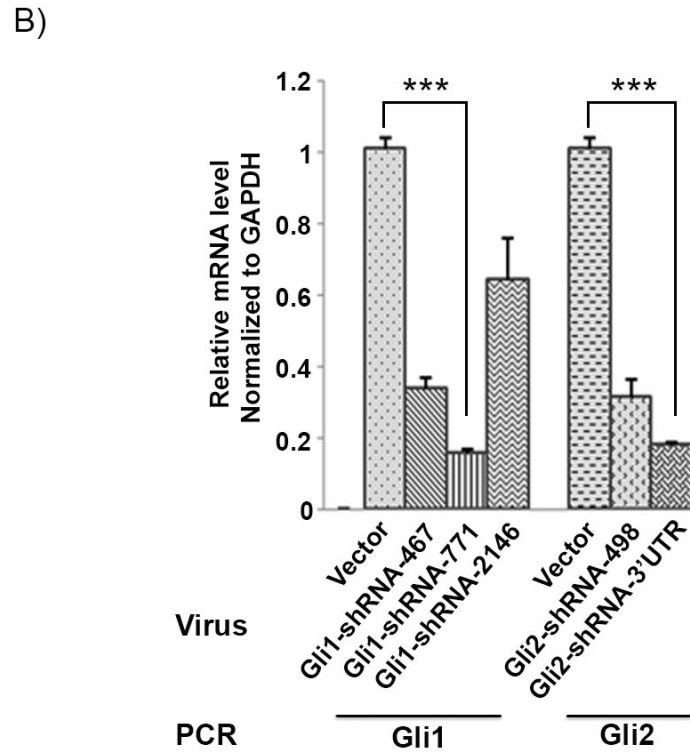

Figure S8

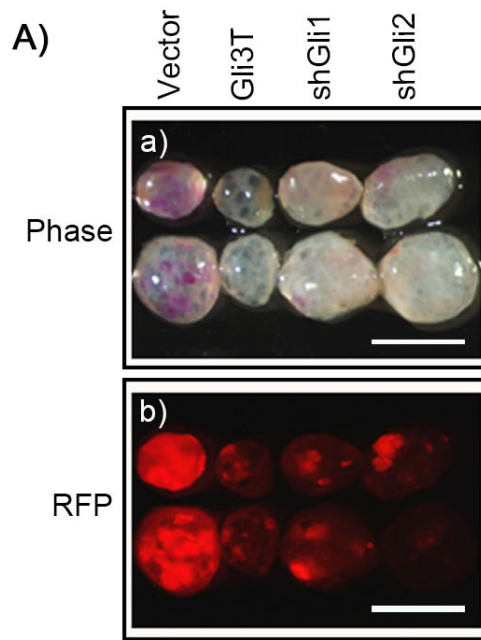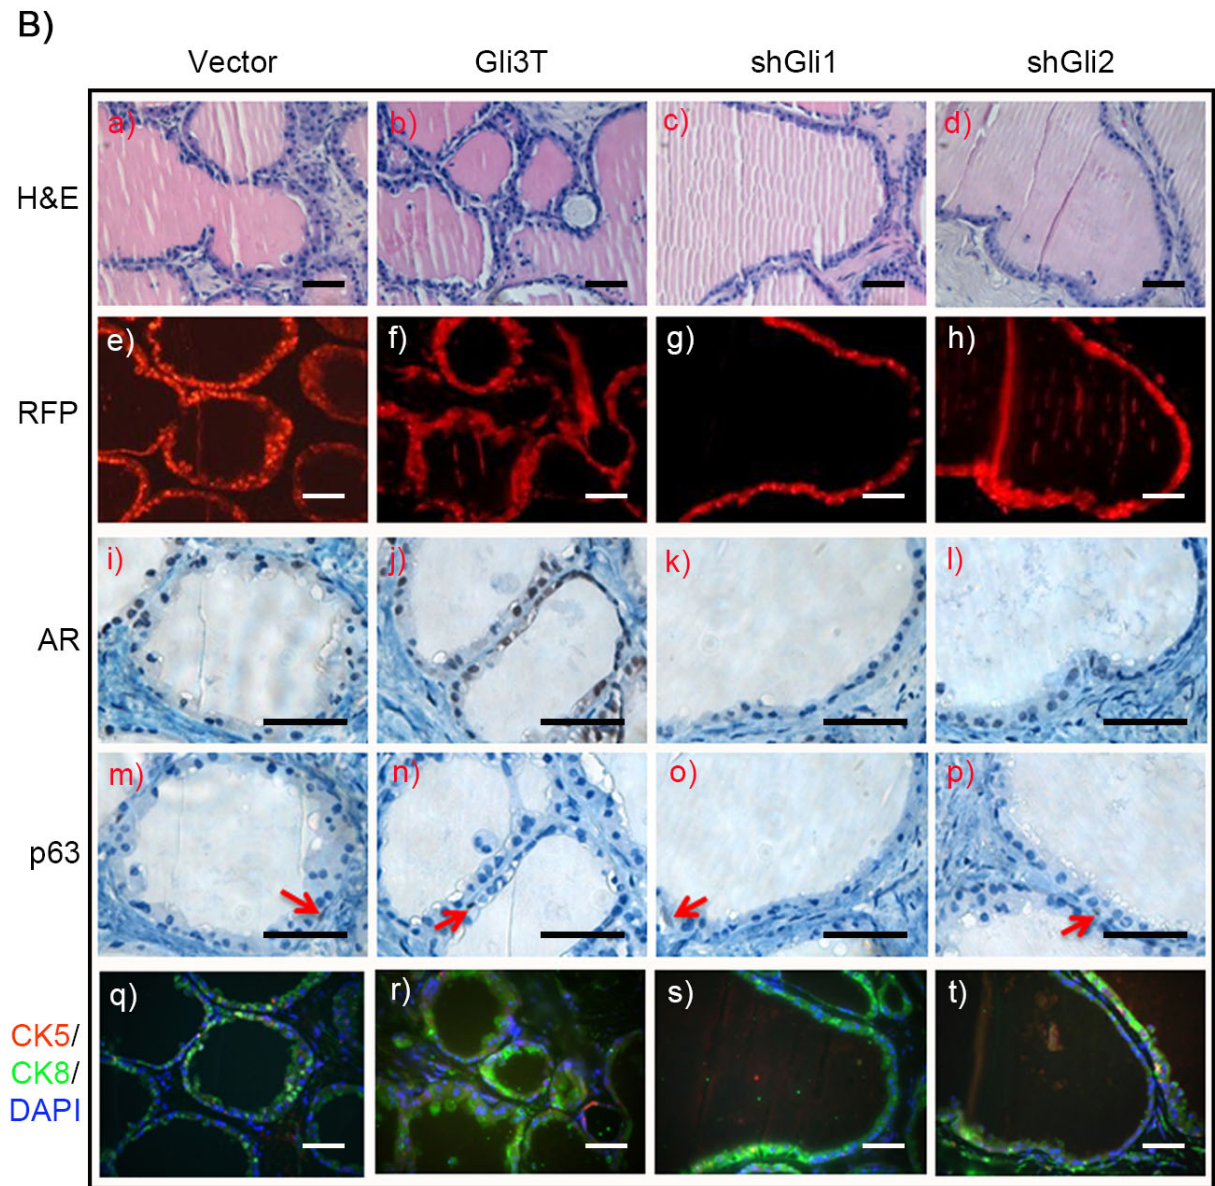

Figure S9

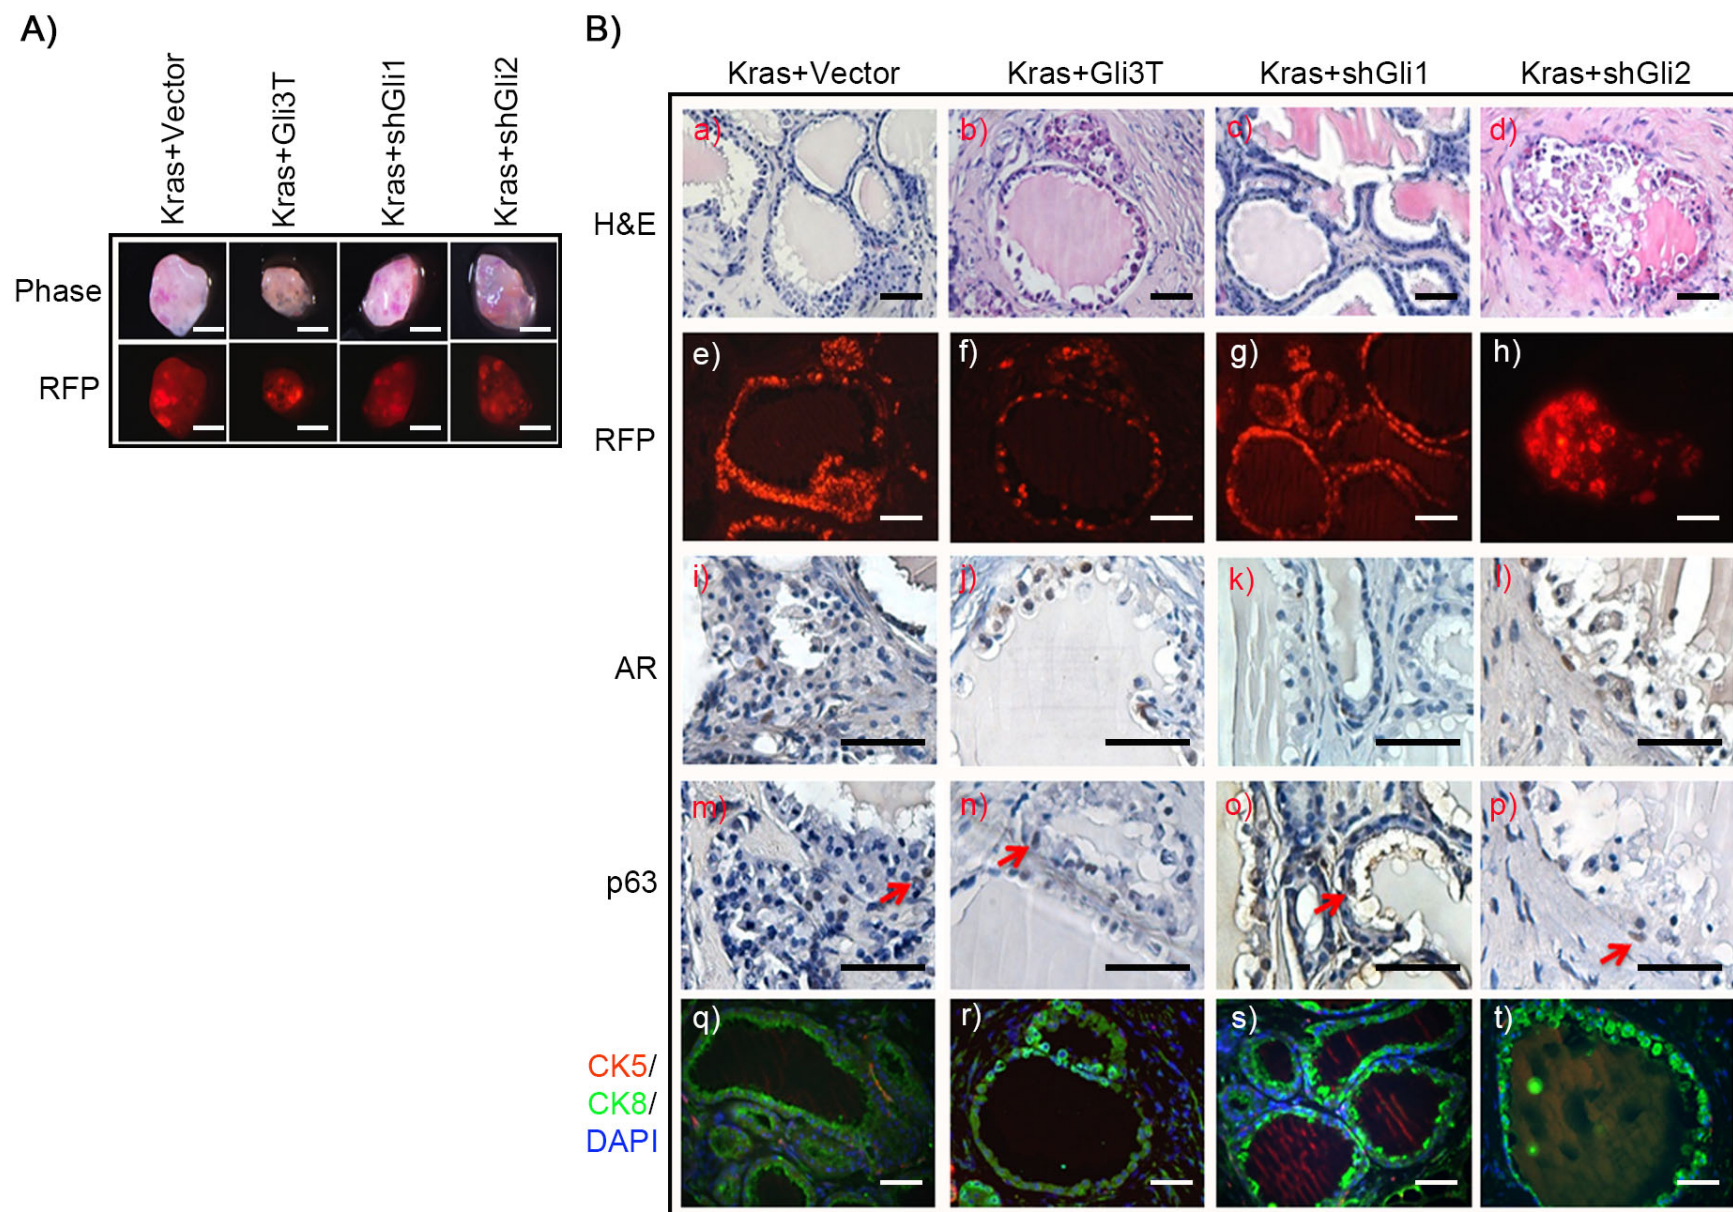

**Table S1. Oligonucleotide primers used for gene cloning and PCR analysis**

| <b>Oligonucleotide</b> | <b>Sequence 5'-3'</b>                                        | <b>Note</b>                                                                                                      |
|------------------------|--------------------------------------------------------------|------------------------------------------------------------------------------------------------------------------|
| hGli3-F(XbaI)          | AGTATCTAGAGCCGCCACCATGGAGGCCAGTCC<br>CACAGC                  | Cloning Gli3T<br>(fragment of Gli3<br>from 1-743 amino<br>acid)                                                  |
| hGli3-743R(XbaI)       | CGCTTCTAGACTAGGCACTGAGGTCTCCTATACTA<br>C                     |                                                                                                                  |
| shGli1-467-F           | TCCCCCTGTGTACCACATGACTCTATTCAAGAGA<br>TAGAGTCATGTGGTACACAGG  | Cloning shRNA-<br>Gli1 in a lentiviral<br>vector                                                                 |
| shGli1-467-R           | AAAACCTGTGTACCACATGACTCTATCTCTTGAA<br>TAGAGTCATGTGGTACACAGG  |                                                                                                                  |
| shGli1-771-F           | TCCCCCACATCAACAGTGAGCATATTTCAAGAGA<br>ATATGCTCACTGTTGATGTGG  |                                                                                                                  |
| shGli1-771-R           | AAAACCACATCAACAGTGAGCATATTTCTCTTGAA<br>ATATGCTCACTGTTGATGTGG |                                                                                                                  |
| shGli1-2416-F          | TCCCCGACTTGAGCATTATGGACAATTCAAGAG<br>ATTGTCCATAATGCTCAAGTCG  |                                                                                                                  |
| shGli1-2416-R          | AAAACGACTTGAGCATTATGGACAATCTCTTGA<br>ATTGTCCATAATGCTCAAGTCG  |                                                                                                                  |
| shGli2-498-F           | TCCCCACCAACCCTTCAGACTATTATTCAAGAGA<br>TAATAGTCTGAAGGGTTGGTG  |                                                                                                                  |
| shGli2-498-R           | AAAACACCAACCCTTCAGACTATTATCTCTTGAA<br>TAATAGTCTGAAGGGTTGGTG  |                                                                                                                  |
| shGli2-3UTR-F          | TCCCTATGTTTACCCGCTCCTATTTTCAAGAGA<br>AAATAGGAGCGGGTAAACATA   |                                                                                                                  |
| shGli2-3UTR-R          | AAAATATGTTTACCCGCTCCTATTTTCTCTTGAA<br>AAATAGGAGCGGGTAAACATA  |                                                                                                                  |
| mPtc1-F                | CTCTGGAGCAGATTTCCAAGG                                        | Real time-PCR<br>primers.<br><br>Bcl2-F and R<br>could be used for<br>detection of<br>human Bcl2 gene<br>as well |
| mPtc1-R                | TGCCGCAGTTCTTTTGAATG                                         |                                                                                                                  |
| mBCL2-F                | GTGGATGACTGAGTACCTGAACC                                      |                                                                                                                  |
| mBCL2-R                | AGCCAGGAGAAATCAAACAGAG                                       |                                                                                                                  |
| mGli2-F                | ACTTTCTCCACACCCTGCTG                                         |                                                                                                                  |
| mGli2-R                | GGCTGCGAGGCTAAAGAGTC                                         |                                                                                                                  |
| mGli1-F                | CCGACGGAGGTCTCTTTGTC                                         |                                                                                                                  |
| mGli1-R                | GCGTCTCAGGGAAGGATGAG                                         |                                                                                                                  |
| mGAPDH-F               | AGGTCGGTGTGAACGGATTTG                                        |                                                                                                                  |

|            |                          |  |
|------------|--------------------------|--|
| mGAPDH-R   | TGTAGACCATGTAGTTGAGGTCA  |  |
| CCSP-F     | ATCTGCCCAGGATTTCTTCA     |  |
| CCSP-R     | TCTTGCTTACACAGAGGACTTGTT |  |
| rtTA-F     | AAGGTTTAACAACCCGTAAACTCG |  |
| rtTA-R     | ATCTCAATGGCTAAGGCG       |  |
| 18S rRNA-F | GTCTGTGATGCCCTTAGATG     |  |
| 18S rRNA-R | AGCTTATGACCCGCACTTAC     |  |
